# Supplementary material for: Weaving Mitochondrial DNA and Y-Chromosome Variation in the Panamanian Genetic Canvas
Source: Genes (Basel). 2021 Nov 29;12(12):1921. doi: 10.3390/genes12121921 (PMC8702192; doi:10.3390/genes12121921)
Supplement: Supplementary file 1 [file genes-12-01921-s001.zip]

Archive with 5 entries (5 files):
- Supplementary Figures.pdf
- Supplementary Table_S1_PanamaDataset_Nov26.xlsx
- Supplementary Table_S2_mtDNAn431_Nov26.xlsx
- Supplementary Table_S3_mtDNAn248_Nov26.xlsx
- Supplementary Table_S4_yChr_Nov26.xlsx
