# Supplementary material for: Weaving Mitochondrial DNA and Y-Chromosome Variation in the Panamanian Genetic Canvas
Source: Genes (Basel). 2021 Nov 29;12(12):1921. doi: 10.3390/genes12121921 (PMC8702192; doi:10.3390/genes12121921)
Supplement: Supplementary file 1 [file genes-12-01921-s001.zip › Supplementary Table_S2_mtDNAn431_Nov26.xlsx]

## Sheet: mtDNA_n431
Table S2. Distribution of mtDNA haplogroups in the Panamanian populations analyzed. Frequencies (absolute and percentage) are also listed for the entire dataset (N = 431).
	Naso		Bribri		Ngäbe		Guna		Emberá		All Indigenous groups		Mestizo		Moreno		General Population		Total
	N = 16		N = 14		N = 71		N = 50		N = 49		N = 200		N = 10		N = 11		N = 210		N = 431
Haplogroup	Abs.	%	Abs.	%	Abs.	%	Abs.	%	Abs.	%	Abs.	%	Abs.	%	Abs.	%	Abs.	%	Abs.	%
A2	1	6.25	0	0	7	9.85915	3	6	9	18.3673	20	10	2	20	2	18.1818	42	20	66	15.3132
A2af1	9	56.25	5	35.7143	10	14.0845	26	52	0	0	50	25	1	10	0	0	55	26.1905	106	24.594
A2w	0	0	0	0	31	43.662	0	0	0	0	31	15.5	6	60	0	0	14	6.66667	51	11.8329
B2	6	37.5	9	64.2857	23	32.3944	10	20	23	46.9388	71	35.5	1	10	2	18.1818	43	20.4762	117	27.1462
C1	0	0	0	0	0	0	11	22	10	20.4082	21	10.5	0	0	0	0	5	2.38095	26	6.03248
D1	0	0	0	0	0	0	0	0	6	12.2449	6	3	0	0	0	0	0	0	6	1.39211
L0	0	0	0	0	0	0	0	0	0	0	0	0	0	0	0	0	4	1.90476	4	0.928074
L1	0	0	0	0	0	0	0	0	0	0	0	0	0	0	0	0	11	5.2381	11	2.5522
L2	0	0	0	0	0	0	0	0	0	0	0	0	0	0	4	36.3636	11	5.2381	15	3.48028
L3	0	0	0	0	0	0	0	0	0	0	0	0	0	0	3	27.2727	15	7.14286	18	4.17633
L4	0	0	0	0	0	0	0	0	0	0	0	0	0	0	0	0	1	0.47619	1	0.232019
H2	0	0	0	0	0	0	0	0	0	0	0	0	0	0	0	0	3	1.42857	3	0.696056
U2	0	0	0	0	0	0	0	0	0	0	0	0	0	0	0	0	1	0.47619	1	0.232019
U3	0	0	0	0	0	0	0	0	0	0	0	0	0	0	0	0	3	1.42857	3	0.696056
X2c	0	0	0	0	0	0	0	0	0	0	0	0	0	0	0	0	1	0.47619	1	0.232019
R*	0	0	0	0	0	0	0	0	1	2.04082	1	0.5	0	0	0	0	1	0.47619	2	0.464037
Haplogroup origin
Indigenous American	16	100	14	100	71	100	50	100	48	97.9592	199	99.5	10	100	4	36.3636	159	75.7143	372	86.3109
Sub-Saharan African	0	0	0	0	0	0	0	0	0	0	0	0	0	0	7	63.6364	42	20	49	11.3689
Western Eurasia	0	0	0	0	0	0	0	0	1	2.04082	1	0.5	0	0	0	0	9	4.28571	10	2.32019
Heterogeneity (H)	0.575		0.494505		0.684507		0.650612		0.703231		0.769347		0.644444		0.8		0.837002		0.822619
Number of haplotypes	3		3		17		10		29		55		6		9		127		173
Haplotype Diversity (Hd)	0.575		0.538		0.855		0.746		0.971		0.943		0.778		0.945		0.988		0.971
Hd variance	0.00639		0.01313		0.00076		0.00225		9e-05		5e-05		0.01889		0.00434		1e-05		1e-05
Hd standard deviation	0.08		0.115		0.027		0.047		0.01		0.007		0.137		0.066		0.003		0.004
