# Supplementary material for: Weaving Mitochondrial DNA and Y-Chromosome Variation in the Panamanian Genetic Canvas
Source: Genes (Basel). 2021 Nov 29;12(12):1921. doi: 10.3390/genes12121921 (PMC8702192; doi:10.3390/genes12121921)
Supplement: Supplementary file 1 [file genes-12-01921-s001.zip › Supplementary Table_S3_mtDNAn248_Nov26.xlsx]

## Sheet: Sheet1
Table S3. Distribution of mtDNA haplogroups in the Panamanian populations analyzed. Frequencies (absolute and percentage) are also listed for the entire male sample (N = 248).
	Naso		Bribri		Ngäbe		Guna		Emberá		All Indigenous groups		Mestizo		Moreno		General Population		Total
	N = 6		N = 8		N = 27		N = 32		N = 16		N = 89		N = 6		N = 4		N = 149		N = 248
Haplogroup	Abs.	%	Abs.	%	Abs.	%	Abs.	%	Abs.	%	Abs.	%	Abs.	%	Abs.	%	Abs.	%	Abs.	%
A2	1	16.6667	0	0	1	3.7037	3	9.375	1	6.25	6	6.74157	2	33.3333	1	25	34	22.8188	43	17.3387
A2af1	3	50	4	50	6	22.2222	13	40.625	0	0	26	29.2135	1	16.6667	0	0	37	24.8322	64	25.8065
A2w	0	0	0	0	13	48.1481	0	0	0	0	13	14.6067	3	50	0	0	9	6.04027	25	10.0806
B2	2	33.3333	4	50	7	25.9259	8	25	9	56.25	30	33.7079	0	0	0	0	34	22.8188	64	25.8065
C1	0	0	0	0	0	0	8	25	4	25	12	13.4831	0	0	0	0	3	2.01342	15	6.04839
D1	0	0	0	0	0	0	0	0	2	12.5	2	2.24719	0	0	0	0	0	0	2	0.806452
L0	0	0	0	0	0	0	0	0	0	0	0	0	0	0	0	0	1	0.671141	1	0.403226
L1	0	0	0	0	0	0	0	0	0	0	0	0	0	0	0	0	5	3.3557	5	2.01613
L2	0	0	0	0	0	0	0	0	0	0	0	0	0	0	1	25	7	4.69799	8	3.22581
L3	0	0	0	0	0	0	0	0	0	0	0	0	0	0	2	50	12	8.05369	14	5.64516
H2	0	0	0	0	0	0	0	0	0	0	0	0	0	0	0	0	2	1.34228	2	0.806452
U3	0	0	0	0	0	0	0	0	0	0	0	0	0	0	0	0	3	2.01342	3	1.20968
X2c	0	0	0	0	0	0	0	0	0	0	0	0	0	0	0	0	1	0.671141	1	0.403226
R*	0	0	0	0	0	0	0	0	0	0	0	0	0	0	0	0	1	0.671141	1	0.403226
Haplogroup origin
Indigenous American	6	100	8	100	27	100	32	100	16	100	89	100	6	100	1	25	117	78.5235	213	85.8871
Sub-Saharan African	0	0	0	0	0	0	0	0	0	0	0	0	0	0	3	75	25	16.7785	28	11.2903
Western Eurasia	0	0	0	0	0	0	0	0	0	0	0	0	0	0	0	0	7	4.69799	7	2.82258
Heterogeneity (H)	0.733333		0.571429		0.675214		0.72379		0.641667		0.855976		0.733333		0.833333		0.825141		0.821275
Number of haplotypes	3		3		10		10		12		34		4		4		92		117
Haplotype Diversity (Hd)	0.733		0.679		0.832		0.829		0.958		0.947		0.8		1		0.988		0.9766
Hd variance	0.02407		0.01489		0.00322		0.00173		0.00132		0.0001		0.02963		0.03125		1e-05		1.69e-05
Hd standard deviation	0.155		0.122		0.057		0.042		0.036		0.01		0.172		0.177		0.003		0.0041
