# Supplementary material for: Weaving Mitochondrial DNA and Y-Chromosome Variation in the Panamanian Genetic Canvas
Source: Genes (Basel). 2021 Nov 29;12(12):1921. doi: 10.3390/genes12121921 (PMC8702192; doi:10.3390/genes12121921)
Supplement: Supplementary file 1 [file genes-12-01921-s001.zip › Supplementary Table_S4_yChr_Nov26.xlsx]

## Sheet: y_n248_hg_freq
Table S4. Distribution of Y-chromosome haplogroups in the Panamanian populations analyzed. Frequencies (absolute and percentage) are also listed for the entire male sample (N = 248).
The following abbreviations are used: M848*: Q-M848(xCTS4000, Z5908, M925, CTS2731, Y780) ; M925*: Q-M925(xY12421, CTS748, Y26583) ; Z780*: Q-Z780(xZ781, Y130237) ; YAP*: E-YAP(xM174, M123, M78, M81, M2).
Western Eurasian lineages were grouped by haplogroup in Fig. 2-6-7 in the text.
	Naso		Bribri		Ngäbe		Guna		Emberà		All Indigenous groups		Mestizo		Moreno		General Population		Total
	N = 6		N = 8		N = 27		N = 32		N = 16		N = 89		N = 6		N = 4		N = 149		N = 248
Haplogroup	Abs.	%	Abs.	%	Abs.	%	Abs.	%	Abs.	%	Abs.	%	Abs.	%	Abs.	%	Abs.	%	Abs.	%
B-M60	0	0	0	0	0	0	0	0	0	0	0	0	0	0	0	0	2	1.34	2	0.806452
>E-M2	0	0	1	12.5	0	0	0	0	0	0	1	1.1236	1	16.67	3	75	23	15.44	28	11.2903
E-YAP(xM174)	0	0	0	0	0	0	0	0	0	0	0	0	0	0	0	0	9	6.04	9	3.62903
>E-M78	0	0	0	0	0	0	0	0	0	0	0	0	0	0	0	0	4	2.68	4	1.6129
>E-M81	0	0	0	0	0	0	0	0	0	0	0	0	0	0	0	0	3	2.01	3	1.20968
>E-M123	0	0	0	0	0	0	0	0	0	0	0	0	0	0	0	0	2	1.34	2	0.806452
G2-P15	0	0	0	0	0	0	0	0	0	0	0	0	1	16.67	0	0	7	4.7	8	3.22581
>G2-M547	0	0	0	0	0	0	0	0	0	0	0	0	0	0	0	0	3	2.01	3	1.20968
I-M258(xM253)	0	0	0	0	0	0	0	0	0	0	0	0	0	0	0	0	5	3.36	5	2.01613
>I1-M253	0	0	0	0	0	0	0	0	0	0	0	0	0	0	0	0	4	2.68	4	1.6129
J1-PAGE8	0	0	0	0	0	0	1	3.13	0	0	1	1.1236	0	0	0	0	3	2.01	4	1.6129
J2-M172 (xPAGE55)	0	0	0	0	0	0	0	0	0	0	0	0	0	0	1	25	1	0.67	2	0.806452
>J2-PAGE55	0	0	0	0	1	3.7	0	0	0	0	1	1.1236	1	16.67	0	0	5	2.68	7	2.82258
Q-M848*	2	33.33	2	25	9	33.33	19	59.38	6	37.5	38	42.6966	1	16.67	0	0	5	3.36	44	17.7419
>Q-M925*	0	0	0	0	3	11.11	1	3.13	0	0	4	4.49438	0	0	0	0	3	2.01	7	2.82258
>>Q-Y12421	2	33.33	0	0	6	22.22	10	31.25	1	6.25	19	21.3483	2	33.33	0	0	10	6.71	31	12.5
Q-Z780*	0	0	0	0	0	0	0	0	6	37.5	6	6.74157	0	0	0	0	1	0.67	7	2.82258
>Q-SA02	2	33.33	0	0	3	11.11	0	0	0	0	5	5.61798	0	0	0	0	1	0.67	6	2.41935
K-M9(xM242)	0	0	0	0	2	7.41	1	3.13	2	12.5	5	5.61798	0	0	0	0	4	3.36	9	3.62903
R1a-M17	0	0	2	25	0	0	0	0	0	0	2	2.24719	0	0	0	0	4	2.68	6	2.41935
R1b-M269	0	0	0	0	0	0	0	0	0	0	0	0	0	0	0	0	1	0.67	1	0.403226
R1b-M269(xS116,U106)	0	0	1	12.5	1	3.7	0	0	0	0	2	2.24719	0	0	0	0	4	2.68	6	2.41935
>R1b-S116	0	0	2	25	2	7.41	0	0	1	6.25	5	5.61798	0	0	0	0	42	28.19	47	18.9516
>R1b-U106	0	0	0	0	0	0	0	0	0	0	0	0	0	0	0	0	2	1.34	2	0.806452
T-M70	0	0	0	0	0	0	0	0	0	0	0	0	0	0	0	0	1	0.67	1	0.403226
Haplogroup origin
Indigenous American	6	100	2	25	21	77.7778	30	93.75	13	81.25	72	80.8989	3	50	0	0	20	13.4228	95	38.3065
Sub-Saharan African	0	0	1	12.5	0	0	0	0	0	0	1	1.1236	1	16.6667	3	75	25	16.7785	30	12.0968
Western Eurasian	0	0	5	62.5	6	22.2222	2	6.25	3	18.75	16	17.9775	2	33.3333	1	25	104	69.7987	123	49.5968
Heterogeneity (H)	0.8		0.8929		0.8319		0.5645		0.7417		0.763		0.9333		0.5		0.8829		0.898263
HgQ Heterogeneity (H)	N = 6	0.8	N = 2	0	N = 21	0.728571	N = 30	0.503448	N = 13	0.615385	N = 72	0.7731	N = 3	0.666667	-	-	N = 20	0.694737	N = 95	0.671221
